# Supplementary material
Source: publisher figshare collection journal article supplement (https://acs.figshare.com/ndownloader/files/11058998)
Supplement: Supplementary file 1 [file 11058998]

# **Exploring Chimeric Calix[4]tetrolarene Molecular Scaffolds: Theoretical Investigations**

Dipali N. Lande and Shridhar P. Gejji\*

Department of Chemistry, Savitribai Phule Pune University, Pune-411 007, India

---

**Supporting Information**

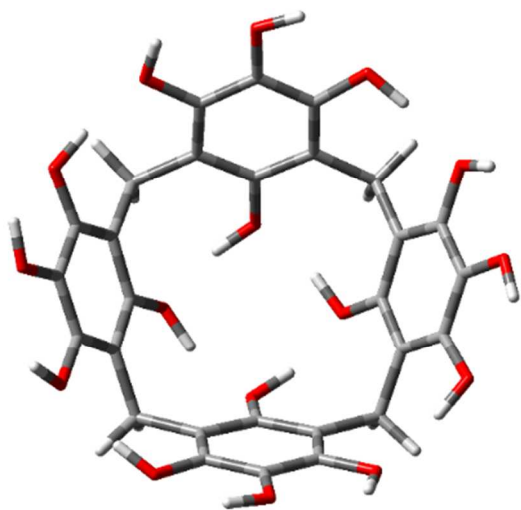

Cone

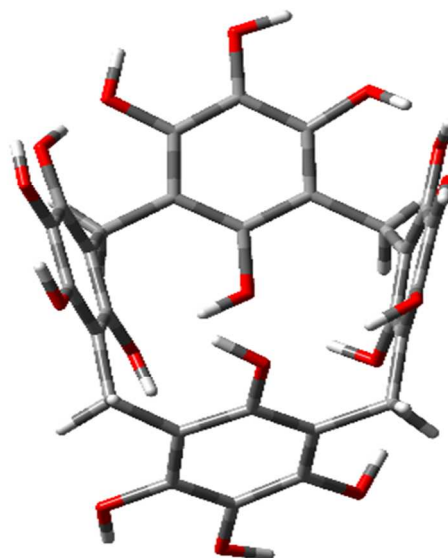

Partial Cone

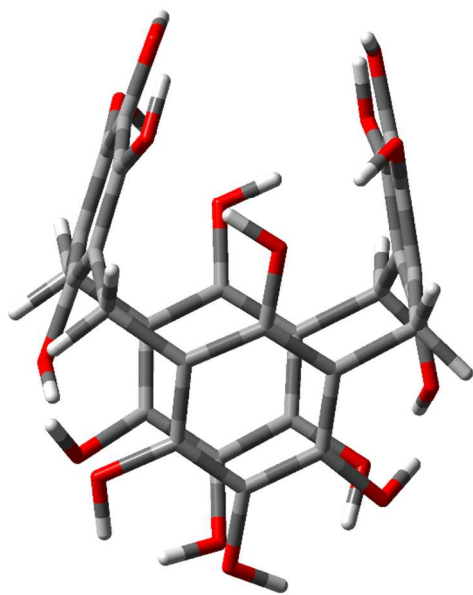

1,3-alternate

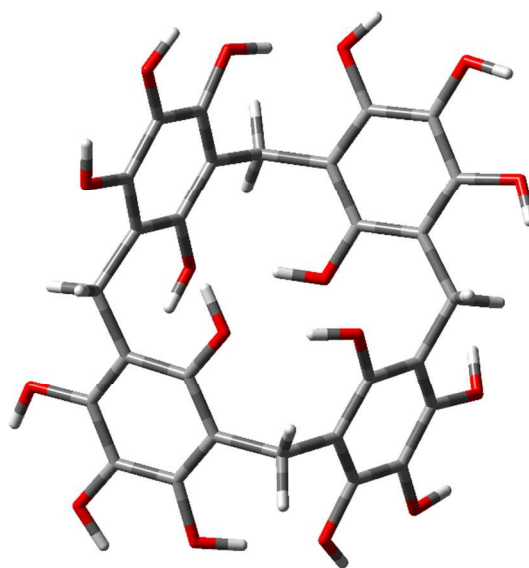

1,2-alternate

**Figure S1** : Stationary point structures for the host I.

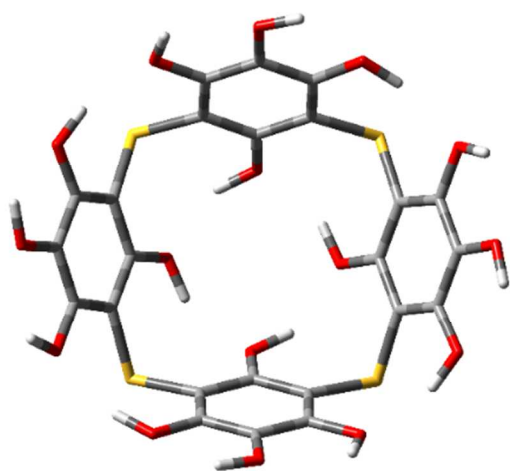

Cone

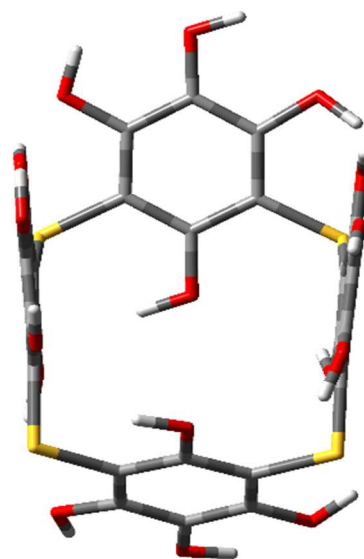

Partial Cone

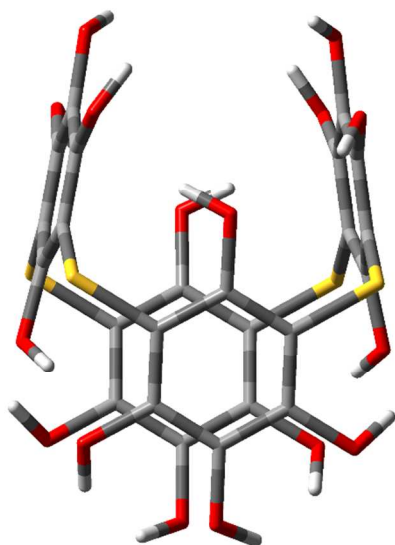

1,3-alternate

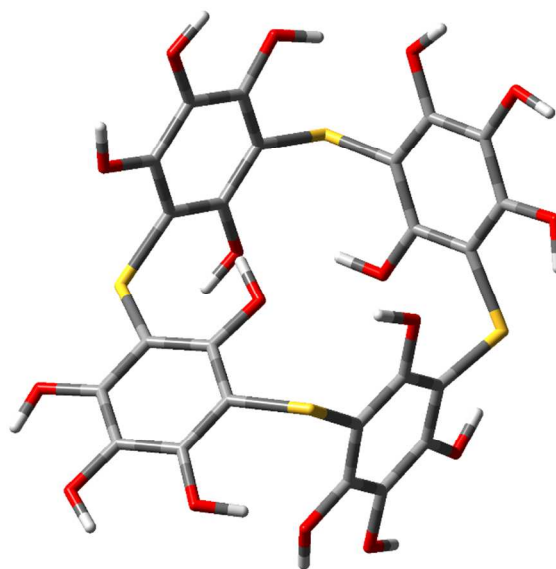

1,2-alternate

**Figure S2:** Stationary point structures for the host II.

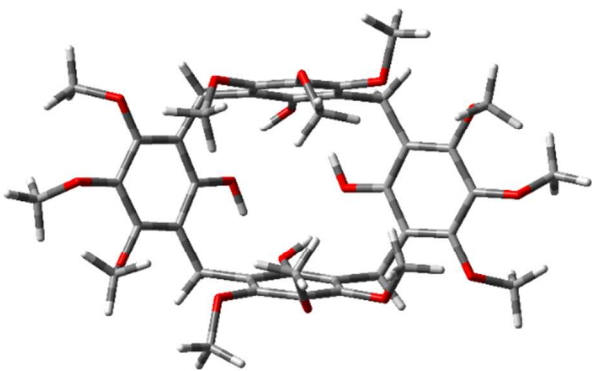

Cone

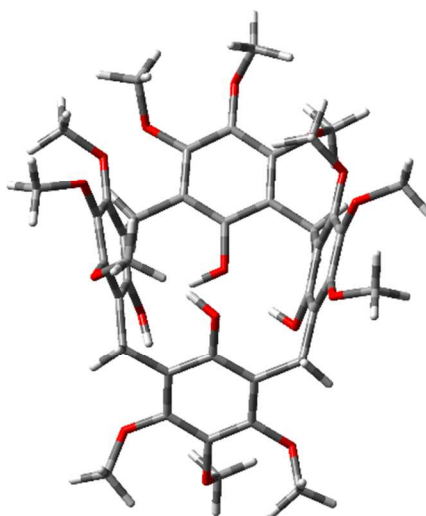

Partial Cone

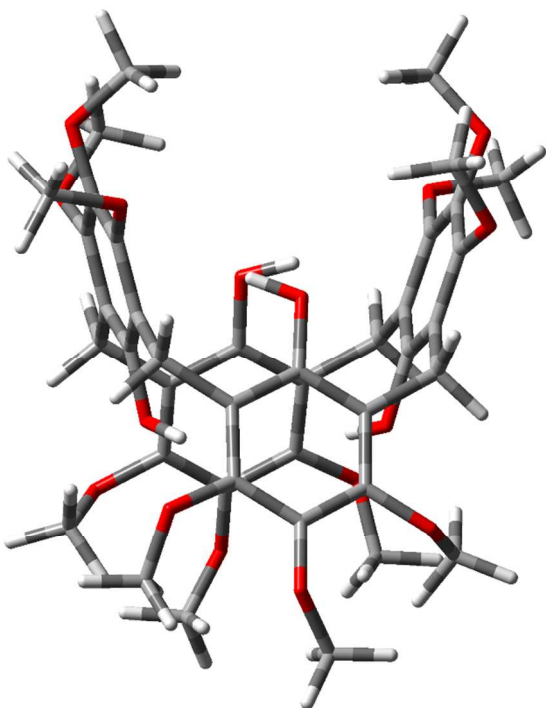

1,3-alternate

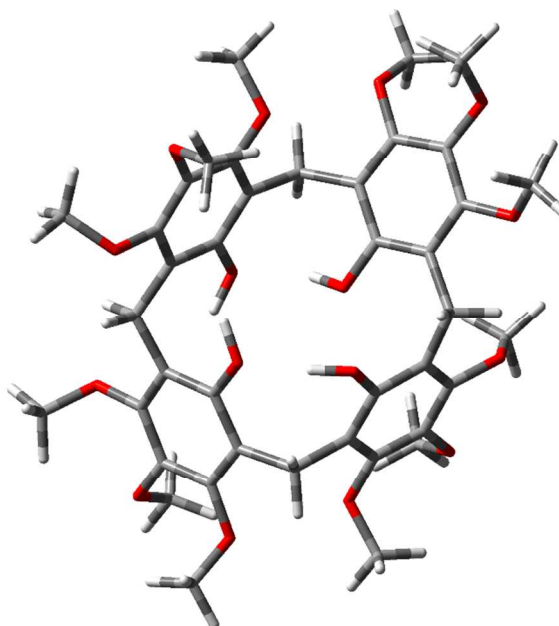

1,2-alternate

**Figure S3:** Stationary point structures for the host **III**.

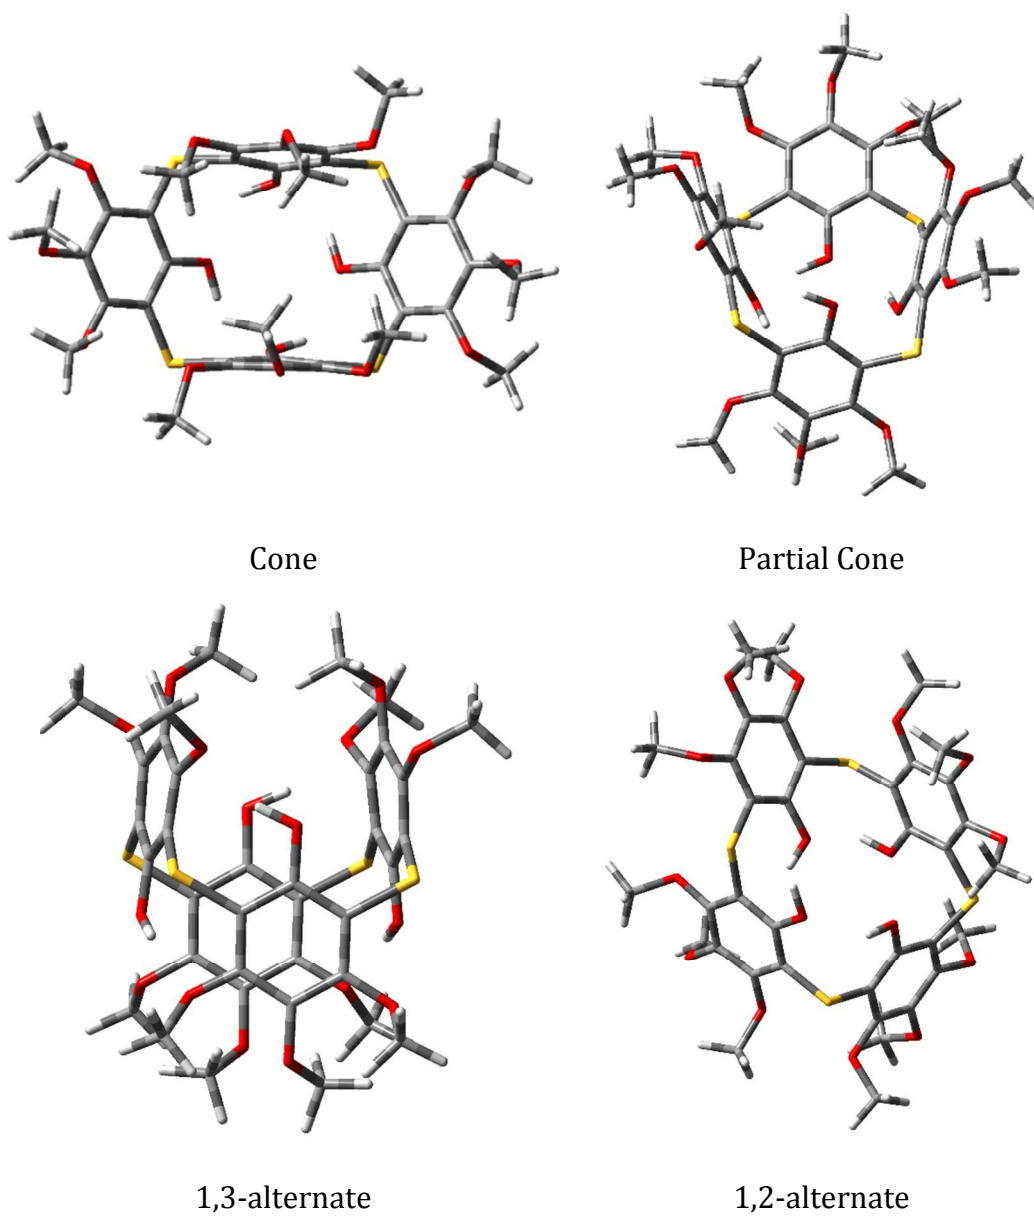

**Figure S4:** Stationary point structures for the host IV.
